# Supplementary material for: Visualizing the Topical Structure of the Medical Sciences: A Self-Organizing Map Approach
Source: PLoS One. 2013 Mar 12;8(3):e58779. doi: 10.1371/journal.pone.0058779 (PMC3595294; doi:10.1371/journal.pone.0058779)
Supplement: Table S1 — Subject responses. (XLS) [file pone.0058779.s001.xls]

## Sheet: Sheet1
Questions	Responses
Own research area (if recognized)	I was able to identify some key associations … would have picked different colors to indicate importance.
	Some terms are insightful because the terms are linked by functionality. Some are weak because the terms are so general that they would apply to very large areas of biology, example DNA.
	The area is generally descriptive of my research/scholarly interests, but includes categories that are not characteristic
	Weak, because Informatics as a method extends across many areas of research.
What part of the map might contain your research if it was on the map? Are there any reasons you can think of the map might leave it off?	Not in data.
	Psychology is not well represented in MEDLINE, OVID would be more relevant.
	Information Science is not really covered by MEDLINE. I could have circled "data collection" or "decision making"
	Didn't see "medical education" but not sure if it is prevalent enough.
Is there anything especially surprising to you about the map? If yes, what?	That 2300 Medical subject headings can fit on this semantic landscape.
	[Map] did not address scientific areas or disciplines but a cacophony of terms.
	Split areas according to my conception of related areas; emphasis on methodology and enabling technology.
	The fact that MeSHs are repeated more than once is surprising at first, but makes plenty of sense, as a method or object is or can be related to many models, diseases, molecular, etc.
	Tough to say. I feel like I would need a long time to really understand.
	The replication of terms is interesting/confusing -> especially "Cohort Studies"
	It combines in one map techniques, anatomical sites, subjects (cells, rat/mice strains), parameters, types of study, etc. there usually can be researched independently, for example when searching topics or subjects of indent in a meeting.
	The redundancy is higher than I was expecting. Too many terms.
	Size of genomics component & it's diversity; lack of predominance of disease terms - they are lower order.
	Interspersal of different types of topics; research methods & techniques that apply to numerous fields (This clutters things, separate into two maps perhaps); doctrinally "pure" topics/fields.
What do you think about the map as a whole? Do you feel it might be useful as a descriptive or pedagogical tool or as a discovery mechanism of some sort? Why or why not?	[The map is a] discovery mechanism for what is missing from subject headings, where is science headed?
	Too detailed to be used in presentations.
	Yes, but a dynamic version would be more valuable; i.e. if people can move areas closer to other and observe reorganization of the rest.
	I was not sure of its use. Maybe in combination w/ older information or to answer specific questions.
	Overall, I like the map, I would display it and like to see how it may evolve over time.
	I do think it is useful as a pedagogical tool or a science policy tool, especially if we could be able superpose it with money or with growth or impact. We could see the associations that yield the "better" results. I think, however, that we would need to drill down one or two levels - at the level of the molecule level for example - in order to be useful for discovery.
	I think it could be used as such, but it comes back to knowing what terms to search for. Once you locate an area then it has potential to show related areas to use for literature searches.
	Yes, because there is no prior categorization it provides a good unbiased view of fields, rather than what contain individuals would consider of value and importance.
	I'm uncertain of the utility. Depends on the goals.
	Useful as a discovery tool if it can identify boundary concepts that show hidden relationships. Otherwise, concern that 2D limits don't permit all or personally relevant relationships needs more defined & bounded regions.
How is this map similar to or different from your "mental map" of how biomedicine is organized?	Not easy to read, there is too much overlapping [text].
	Is biomedicine organized? Usually we see it [organized] by (1.) disease category [or] (2.) broad disciplines.]
	Recognizable topics but I would use different combinations or summary of categories
	I think my mental map looks more like an ontology. It is similar, although it operates on many levels: the map shows, at the same time, objects, methods, diseases, and causes. Hence, one paper can fall on several areas of the map. Given the high importance of genetics/proteomics, it is not surprising that it accounts for about a fifth of the map. It would be very interesting to see this evolution…
	I can only really comment on the research portion, but it seems to do an OK job -> just like globes/maps, difficulty comes in portraying multi-D mental map onto 2D projection.
	Definitely acceptable as "one view" for these connections.
	… Usually the categorization is different, functional… methodological etc. everything here is combined.
	Where I have prior knowledge, the map seemed logical. There was more "nesting" then I might have thought.
	I see them as much more stove piped & some of the proximities may reflect needs of the algorithm to provide boundaries.
	I am too much of a novice to have formed one: other than brain, body, cell, animals, plants, specific illnesses-cancer (I was happy to come up with at least 6 areas - I didn't know if I could do it); These are what I seek out in the map which is "plastic" enough to allow me to find & impose on map. But this was not a clean process. Also while doing this, I am not learning from this map.
Have you seen large-scale maps of medical data before? How do they compare to this one?	No [5 subjects]
	this [map] contained more detail [2 subjects]
	Easier to navigate
	… it is the first one I see that user "controlled" vocabulary. They are also generally represented as "networks" and hence, terms are not repeated more than once.
	I've only seen one, a primitive version of this one, only encompassing PNAS data.
Would you have any other comments on the map or this study?	I saw very little behavioral science.
	I have a feeling that some major topics are left out. A major topic could be one that is practiced by 1500 or more scientists (example)
	I would offer to try coding surfaces (not only labels) with color (to distinguish better light vs surface (the third dimension like in heat maps).
	I think it would be a good policy map which should be overlaid with countries/institutions research output, funding, impact, etc. "Zones", for instance, could be filled with different colors etc.
	There seems to be a factor of concern that I can't grasp w/ regard to the keywords or timing of keyword changes etc. that might bias the portrayal.
	Some areas I would have expected are not there. News pharmocology, evolution, etc.
	Peaks & valleys hard to infer—need contour lines or the equivalent.
